# Supplementary material for: Isolation and Quantification of MicroRNAs from Urinary Exosomes/Microvesicles for Biomarker Discovery
Source: PubMed Central journal article supplement — Int J Biol Sci. 2013 Oct 12;9(10):1021–31. doi: 10.7150/ijbs.6100 (PMC3831115; doi:10.7150/ijbs.6100), 2013-10-12

**Supplementary Figure 1:** Confirmation of AQP2 and CD24 primer specificity with dissociation curve analysis and agarose gel electrophoresis. The dissociation curve showed single peak at 80.9 and 87.0°C for CD24 and AQP2 respectively. And the agarose gels of the amplified product revealed single bands corresponding to the predicted amplicon length (111bp, 153 bp for CD24 and AQP2 respectively).

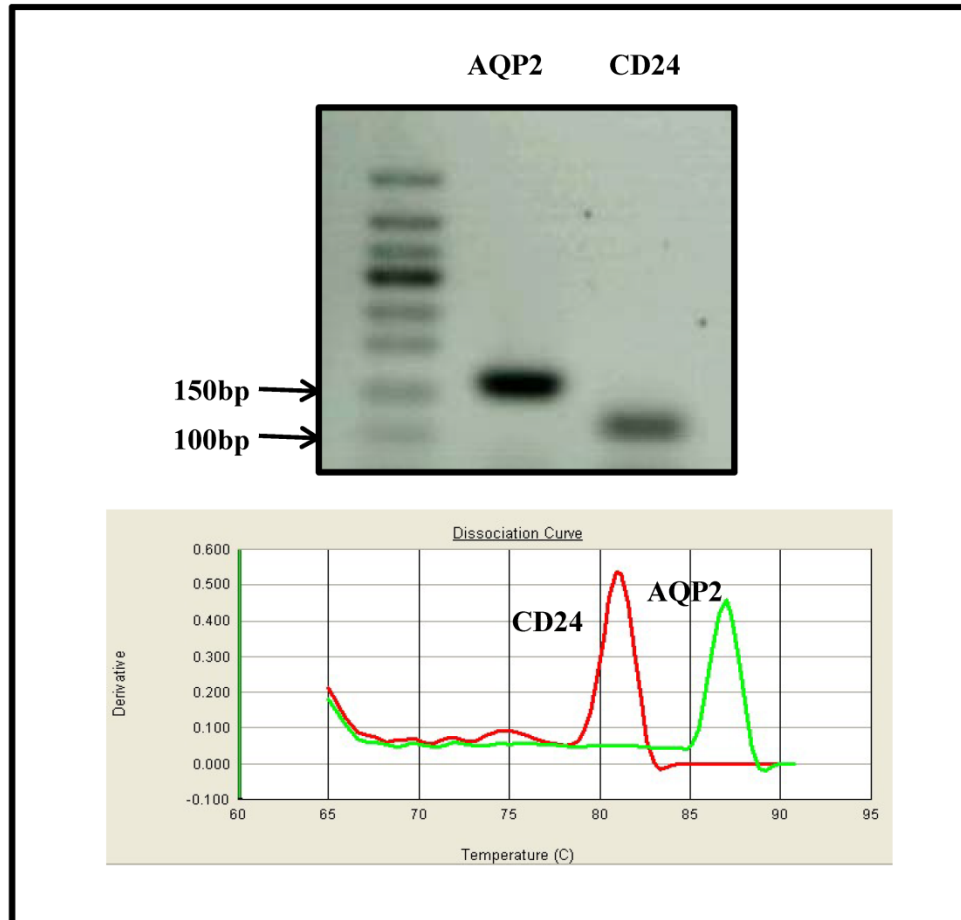

Supplement: ijbsv09p1021s1.pdf [file ijbsv09p1021s1.pdf]
